# Supplementary material for: A new highly conjugated crossed benzodithiophene and its donor–acceptor copolymers for high open circuit voltages polymer solar cells
Source: Royal Society of Chemistry journal article supplement (doi:10.1039/c5py00117j), 2015-01-01
Supplement: c5py00117j1.pdf [file c5py00117j1.pdf]

## Electronic Supplementary Information

# **A New High Conjugated Crossed Benzodithiophene and Its Donor-Acceptor Copolymers for High Open Circuit Voltages Polymer Solar Cells**

Deyu Liu <sup>‡,a,b</sup>, Chunyang Gu <sup>‡,b</sup>, Manjun Xiao <sup>b</sup>, Meng Qiu <sup>b</sup>, Mingliang Sun <sup>a\*</sup>, Renqiang Yang <sup>b\*</sup>

<sup>a</sup> *Institute of Material Science and Engineering, Ocean University of China, Qingdao 266100, People's Republic of China.*

<sup>b</sup> *CAS Key Laboratory of Bio-based Materials, Qingdao Institute of Bioenergy and Bioprocess Technology, Chinese Academy of Sciences, Qingdao 266101, People's Republic of China.*

Correspondence to: M. Sun (E-mail: mlsun@ouc.edu.cn); R. Yang (E-mail: yangrq@qibebt.ac.cn)

<sup>‡</sup> *These authors contributed equally to this work.*

## 1. X-ray Diffraction

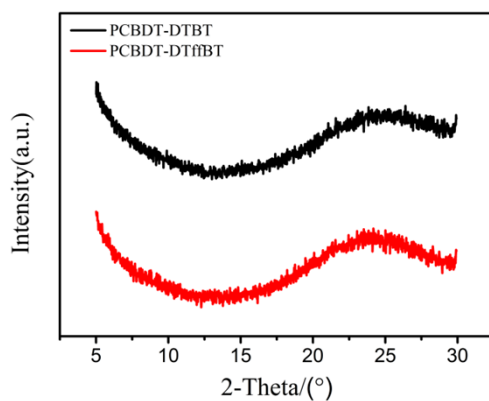

**Fig. S1** X-ray diffraction (XRD) pattern of the PCBDT-DTBT and the PCBDT-DTffBT.

## 2. $^1\text{H}$ NMR and $^{13}\text{C}$ NMR spectra of monomers and polymers

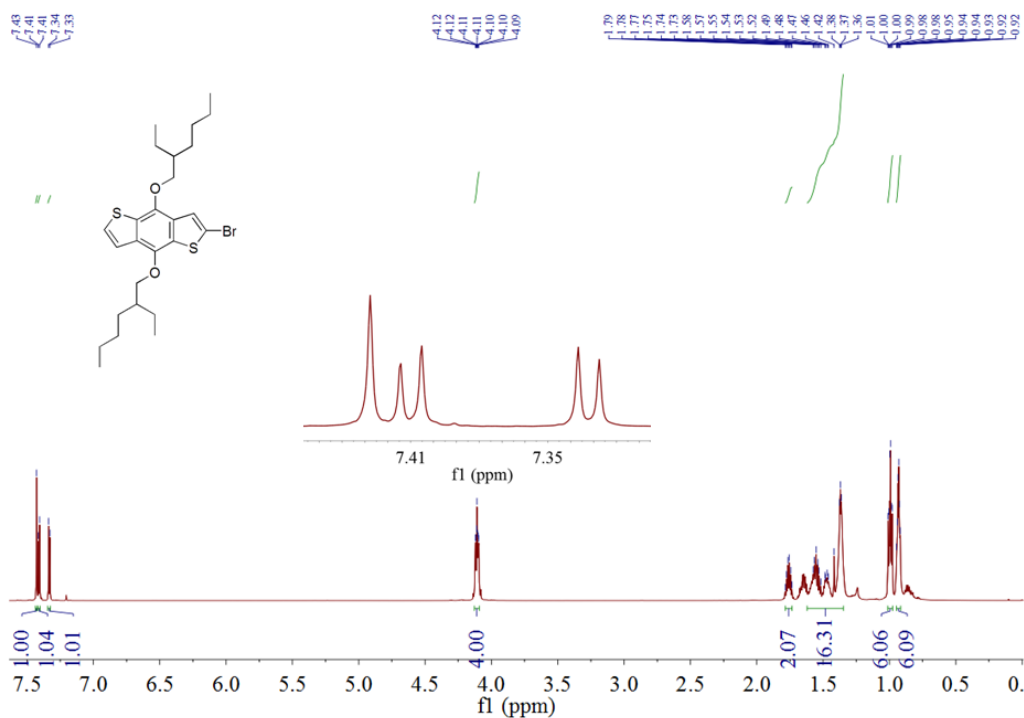

**Fig. S2**  $^1\text{H}$  NMR spectra of compound 1.

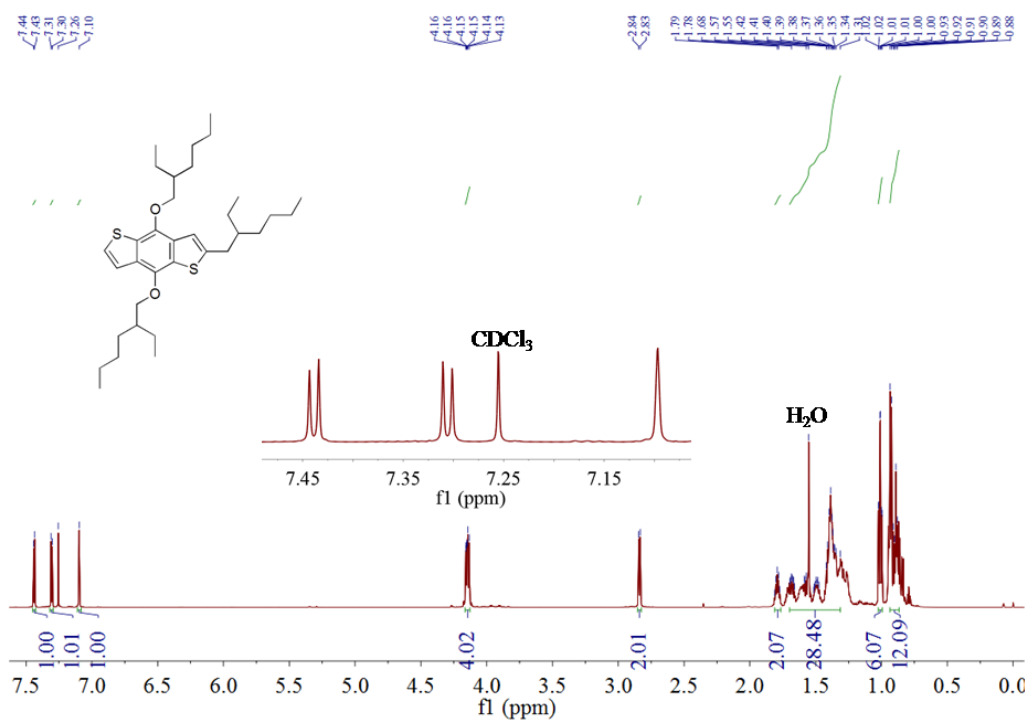

Fig. S3  $^1\text{H}$  NMR spectra of compound 2.

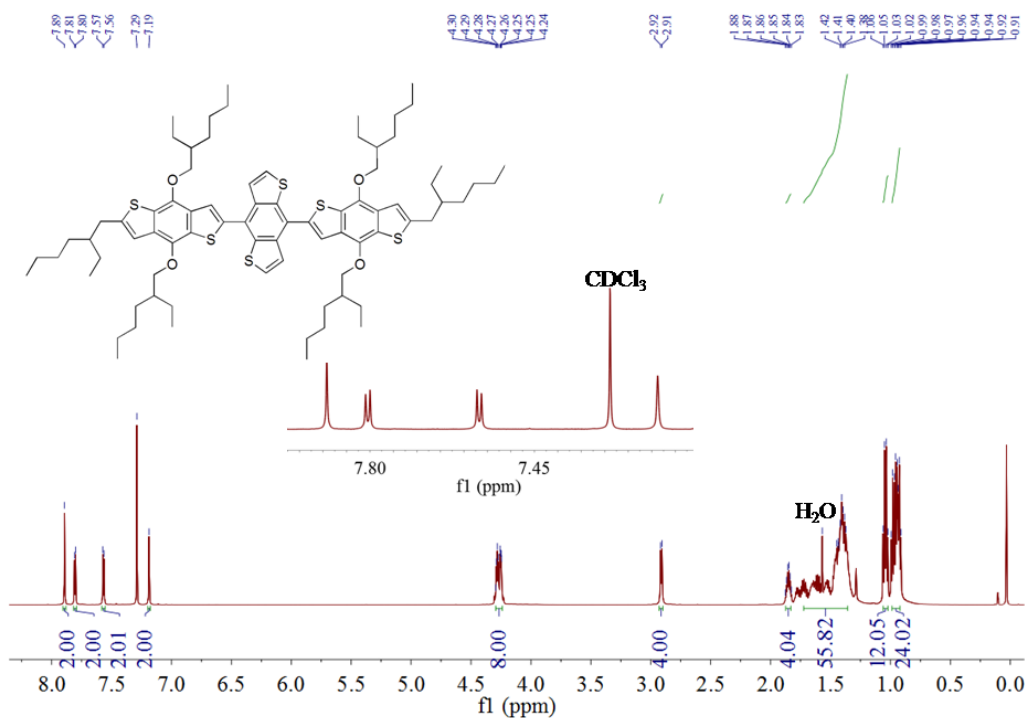

Fig. S4  $^1\text{H}$  NMR spectra of Crossed-BDT.

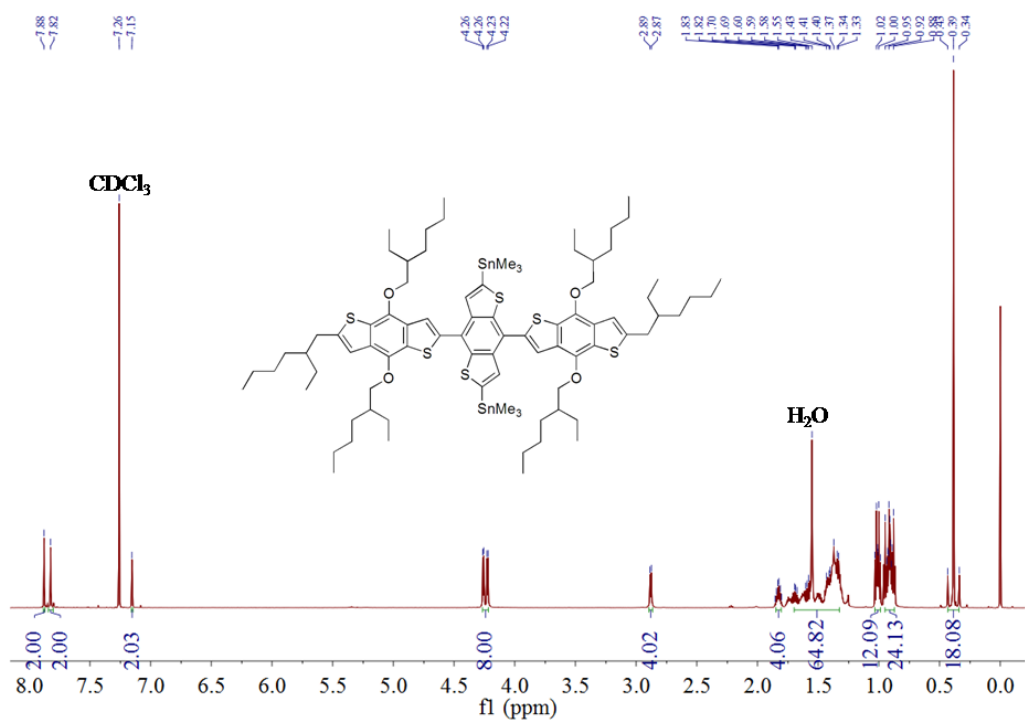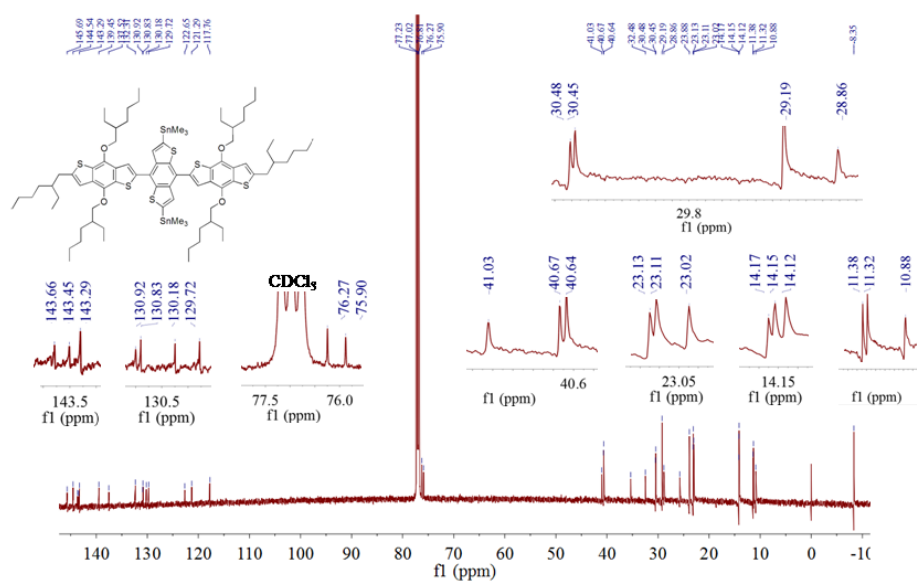

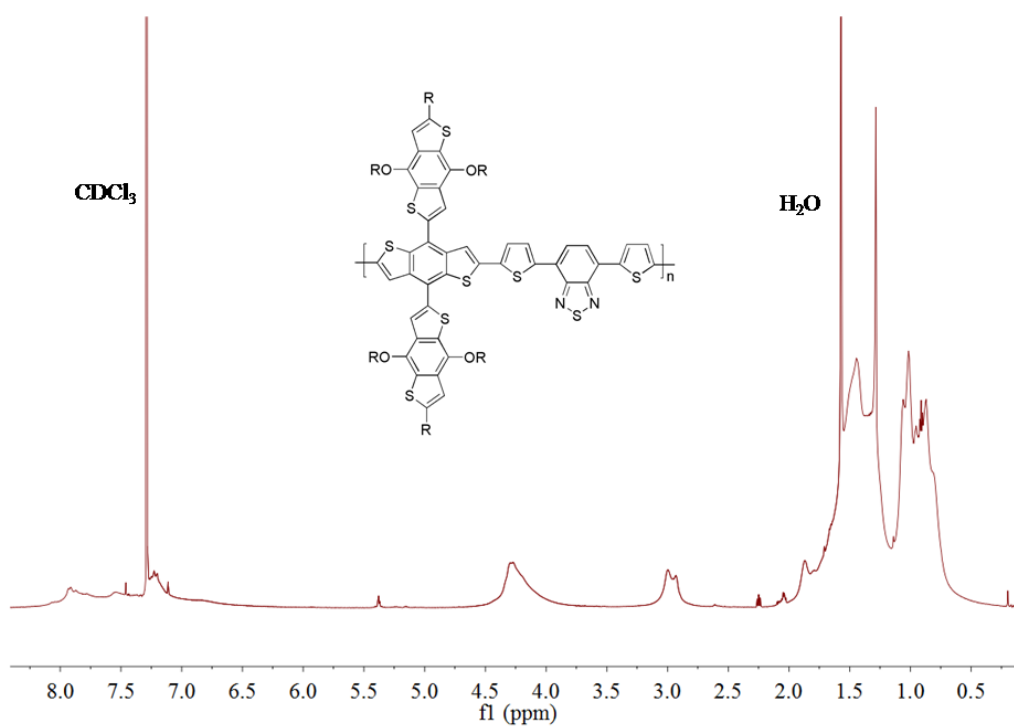

**Fig. S7** <sup>1</sup>H NMR spectra of the PCBDT-DTBT.

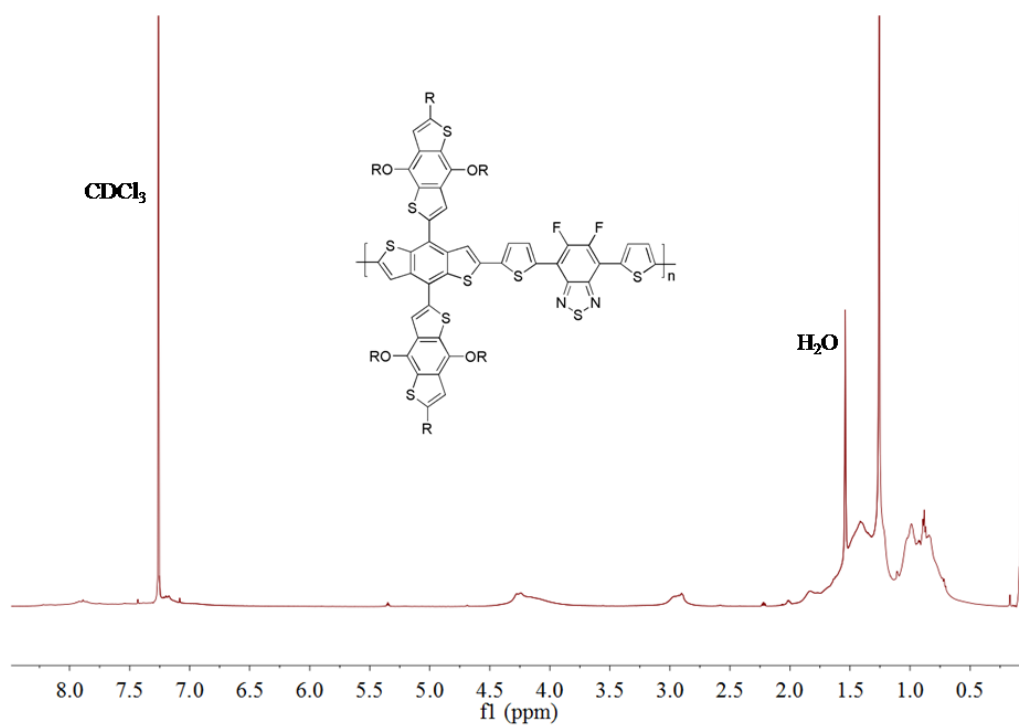

**Fig. S8** <sup>1</sup>H NMR spectra of the PCBDT-DTffBT.
